# Supplementary material
Source: PubMed Central journal article supplement (PMC8577869)
Supplement: mmc4.pdf [file mmc4.pdf]

### Control group

- このワクチンには、**発症予防効果**があることが確認されています。
- 接種により、あなた自身が新型コロナに感染した場合に発症する可能性を下げる効果があります。
- 接種により、接種部位の痛みや腫れ、発熱などが生じる可能性があります。
- 稀に、アナフィラキシーなどの副反応が生じる場合もありますが、適切に対処されれば問題ないことが確認されており、日本の接種場所でも、適切に対処できるように準備されています。

### Treatment group A: Comparison nudge (Top for older adults, Bottom for young adults)

- このワクチンには、**発症予防効果**があることが確認されています。
- 接種により、あなた自身が新型コロナに感染した場合に発症する可能性を下げる効果があります。
- 接種により、接種部位の痛みや腫れ、発熱などが生じる可能性があります。
- 稀に、アナフィラキシーなどの副反応が生じる場合もありますが、適切に対処されれば問題ないことが確認されており、日本の接種場所でも、適切に対処できるように準備されています。

**あなたと同じ年代の10人中7～8人が、  
このワクチンを接種すると回答しています。**

- このワクチンには、**発症予防効果**があることが確認されています。
- 接種により、あなた自身が新型コロナに感染した場合に発症する可能性を下げる効果があります。
- 接種により、接種部位の痛みや腫れ、発熱などが生じる可能性があります。
- 稀に、アナフィラキシーなどの副反応が生じる場合もありますが、適切に対処されれば問題ないことが確認されており、日本の接種場所でも、適切に対処できるように準備されています。

**あなたと同じ年代の10人中6～7人が、  
このワクチンを接種すると回答しています。**

### *Treatment group B: Influence-gain nudge*

- このワクチンには、**発症予防効果**があることが確認されています。
- 接種により、あなた自身が新型コロナに感染した場合に発症する可能性を下げる効果があります。
- 接種により、接種部位の痛みや腫れ、発熱などが生じる可能性があります。
- 稀に、アナフィラキシーなどの副反応が生じる場合もありますが、適切に対処されれば問題ないことが確認されており、日本の接種場所でも、適切に対処できるように準備されています。

ワクチンを接種した人が増えると、  
ワクチン接種を希望する人も増えることが分かっています。  
**あなたのワクチン接種が、周りの人のワクチン接種を後押しします。**

### *Treatment group C: Influence-loss nudge*

- このワクチンには、**発症予防効果**があることが確認されています。
- 接種により、あなた自身が新型コロナに感染した場合に発症する可能性を下げる効果があります。
- 接種により、接種部位の痛みや腫れ、発熱などが生じる可能性があります。
- 稀に、アナフィラキシーなどの副反応が生じる場合もありますが、適切に対処されれば問題ないことが確認されており、日本の接種場所でも、適切に対処できるように準備されています。

ワクチンを接種した人が増えると、  
ワクチン接種を希望する人も増えることが分かっています。  
**あなたがワクチンを接種しないと、  
周りの人のワクチン接種が進まない可能性があります。**
